# Supplementary material
Source: PubMed Central journal article supplement (PMC4225593)
Supplement: mmc1.pdf [file mmc1.pdf]

The American Journal of Human Genetics, Volume 95

Supplemental Data

## **Cross-Tissue and Tissue-Specific eQTLs:**

## **Partitioning the Heritability of a Complex Trait**

Jason M. Torres, Eric R. Gamazon, Esteban J. Parra, Jennifer E. Below, Adan Valladares-Salgado, Niels Wachter, Miguel Cruz, Craig L. Hanis, and Nancy J. Cox

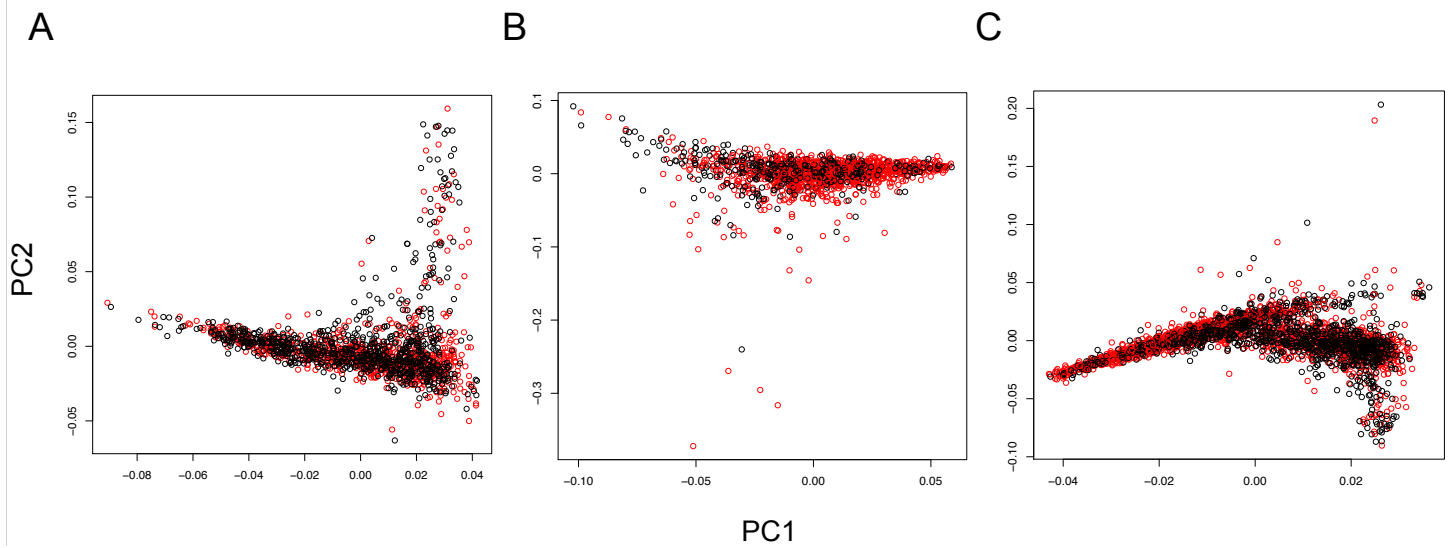

Figure S1. Principal components (PC) analyses of the Hispanic GWAS datasets. Plots of PC1 versus PC2 are shown for the SCT (A), MCM (B), and MH (C) datasets. Black circles indicate controls and red circles indicate cases.

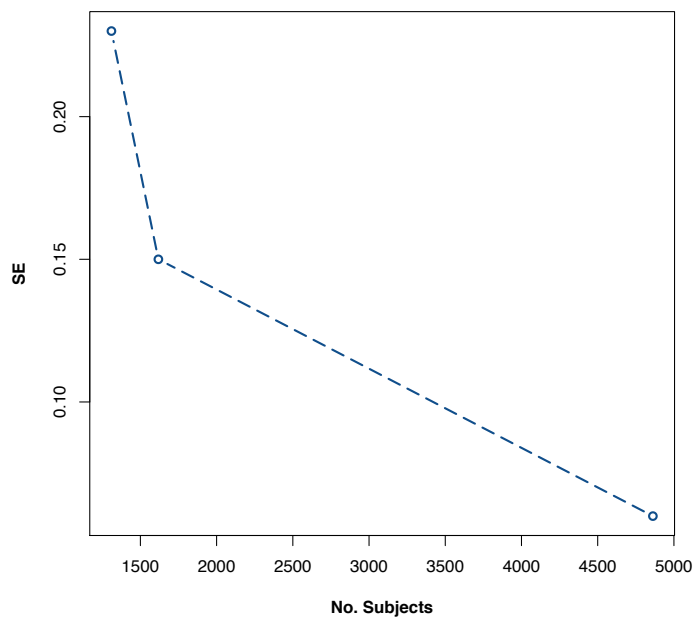

Figure S2. Standard error versus number of subjects represented in each GWAS dataset. From left to right; MCM, SCT, WTCCC.

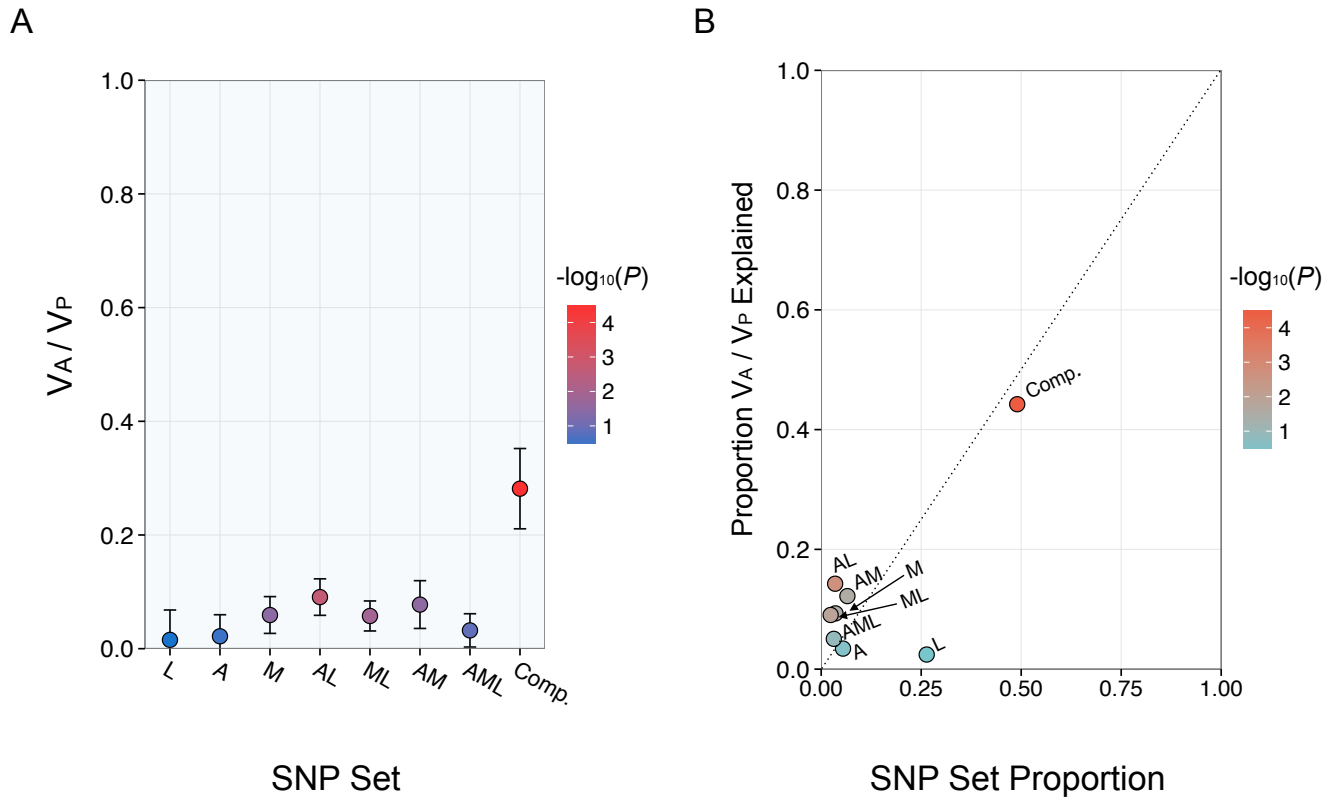

Figure S3. Baseline subset analysis of the WTCCC dataset. (A) The narrow-sense heritability estimates ( $V_A/V_P$ ) attributable to disjoint SNP subsets and (B) proportion of explained variance by SNP set proportion for each subset are shown with color corresponding to  $-\log_{10}(p\text{-value})$ .

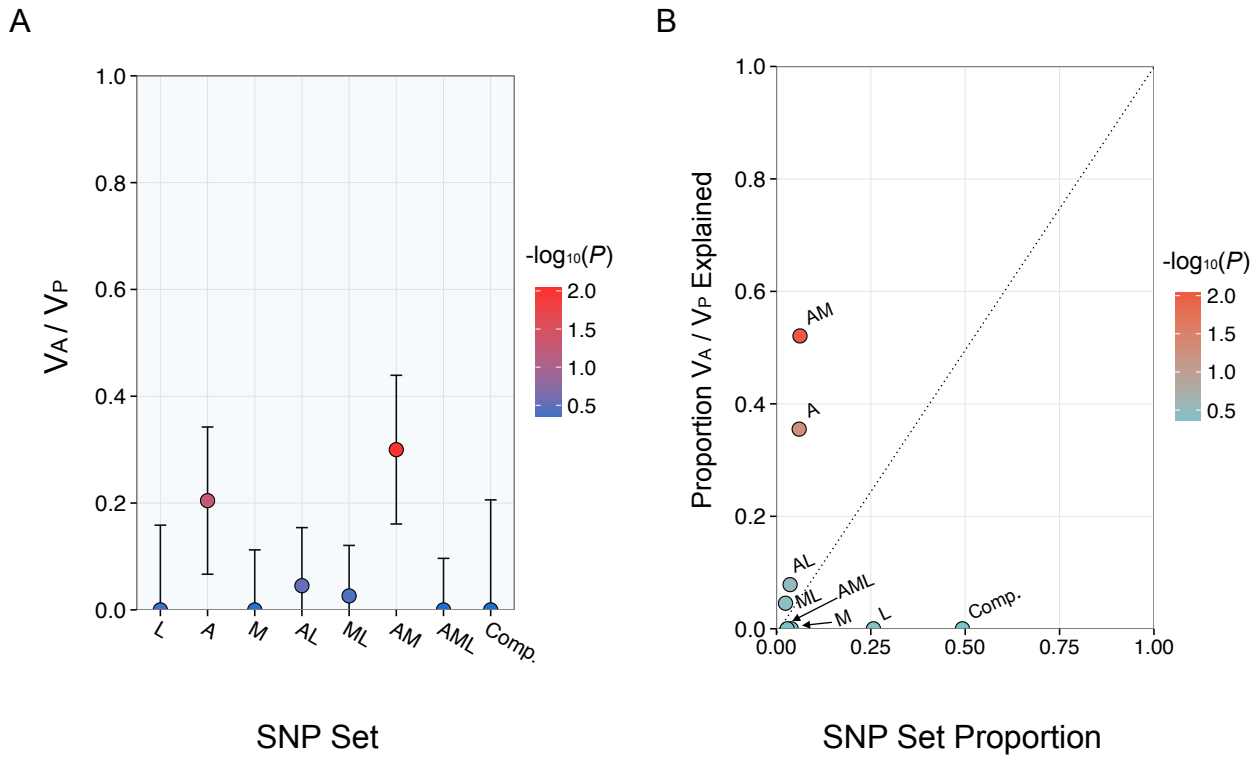

Figure S4. Baseline subset analysis of the merged Hispanic dataset. (A) The narrow-sense heritability estimates ( $V_A/V_P$ ) attributable to disjoint SNP subsets and (B) proportion of explained variance by SNP set proportion for each subset are shown with color corresponding to  $-\log_{10}(p\text{-value})$ .

A

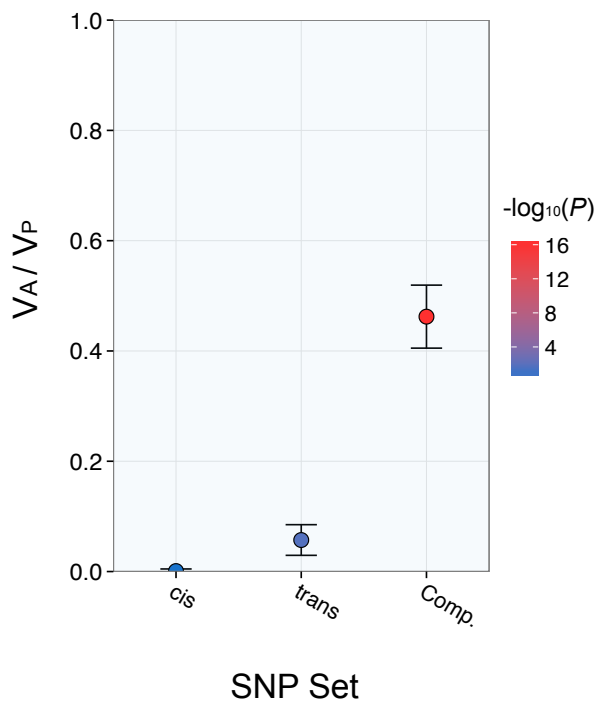

B

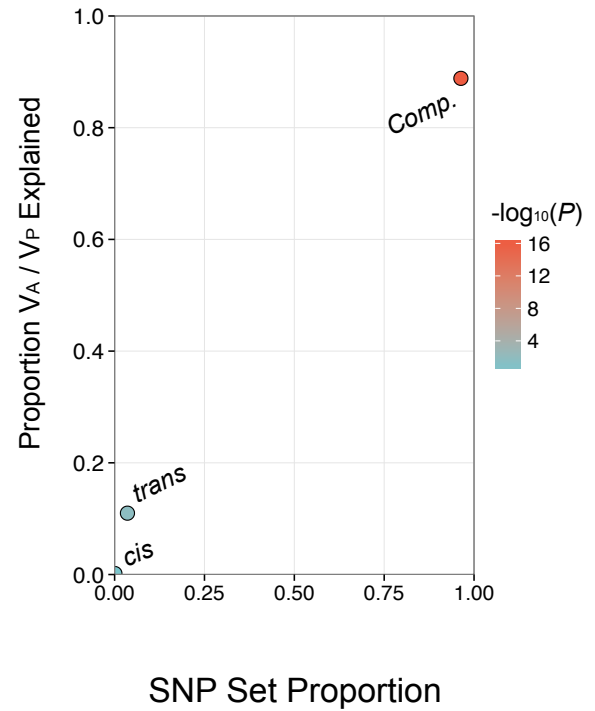

Figure S5. Analysis of heritability from *cis* and *trans* skeletal muscle eQTLs in the WTCCC dataset. (A) The narrow-sense heritability estimates ( $V_A/V_P$ ) attributable to disjoint SNP subsets and (B) proportion of explained variance by SNP set proportion for each subset are shown with color corresponding to  $-\log_{10}(p\text{-value})$ .

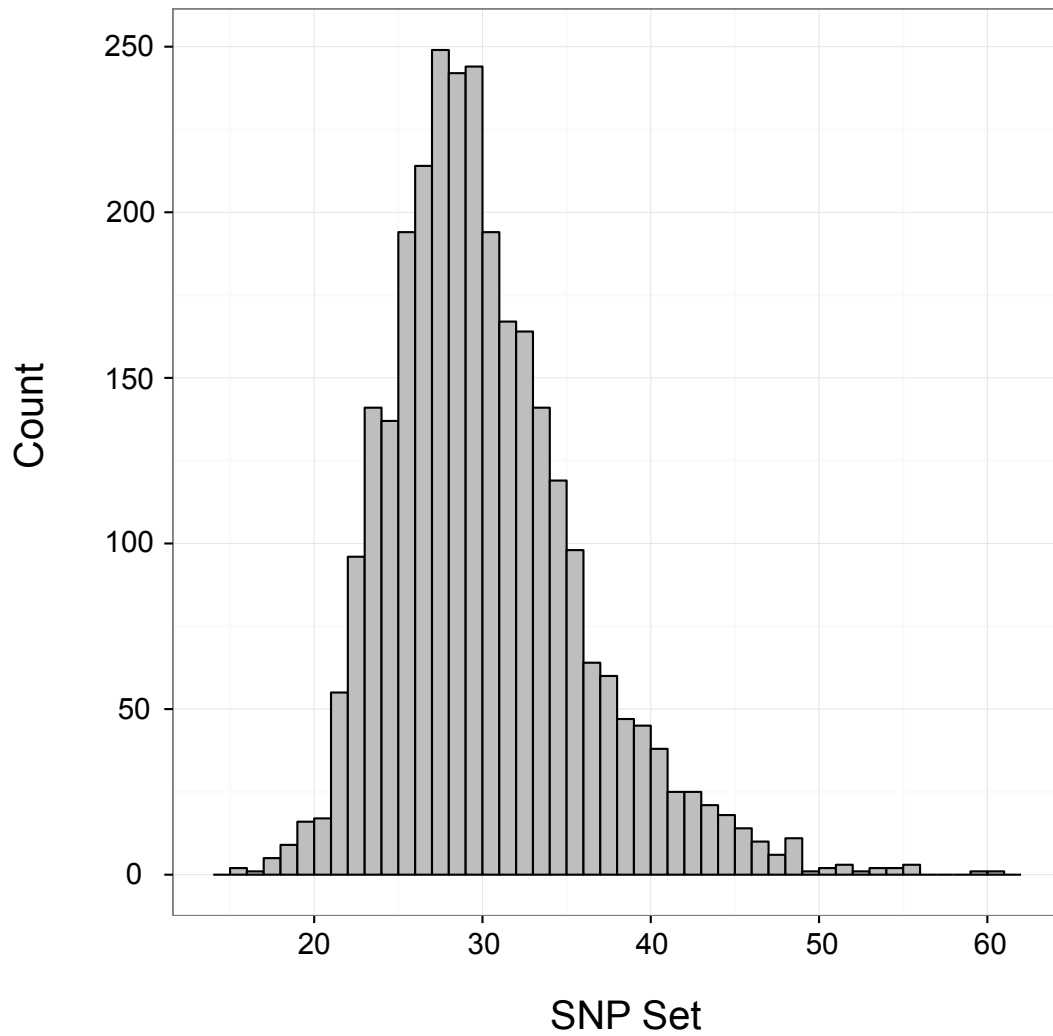

Figure S6. BMI distribution of the merged Hispanic dataset. Mean value with standard deviation,  $30.12 \pm 5.74 \text{ kg/m}^2$ .

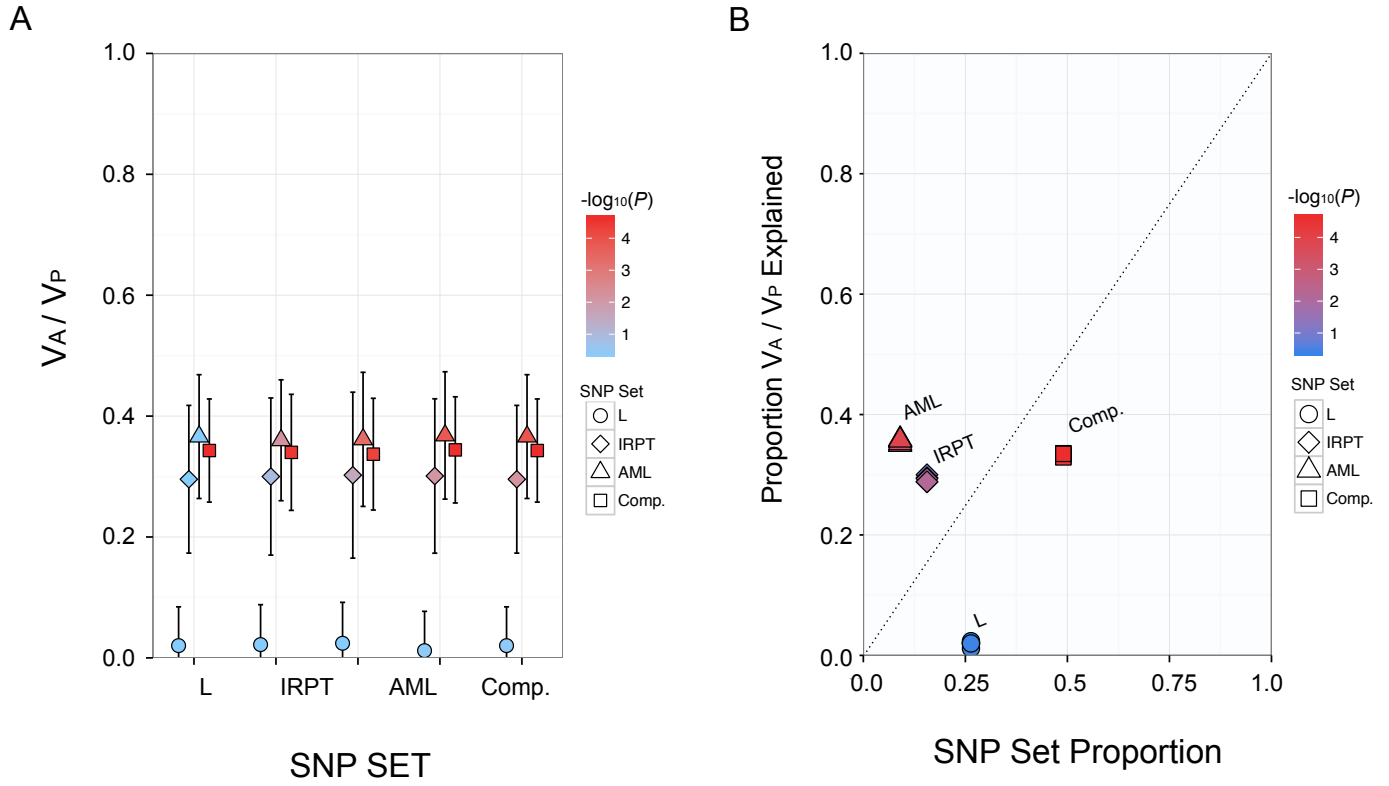

Figure S7. GRM-adjusted partition analysis of the WTCCC dataset. (A) The narrow-sense heritability estimates ( $V_A/V_P$ ) attributable to disjoint SNP subsets in the IRPT-LCL partition are shown at each assumed MAF threshold ( $\theta$ ) for causal variants and (B) proportion of explained variance by SNP set proportion for each subset are shown with color corresponding to  $-\log_{10}(p\text{-value})$ . The shape of each point designates the subset identity.

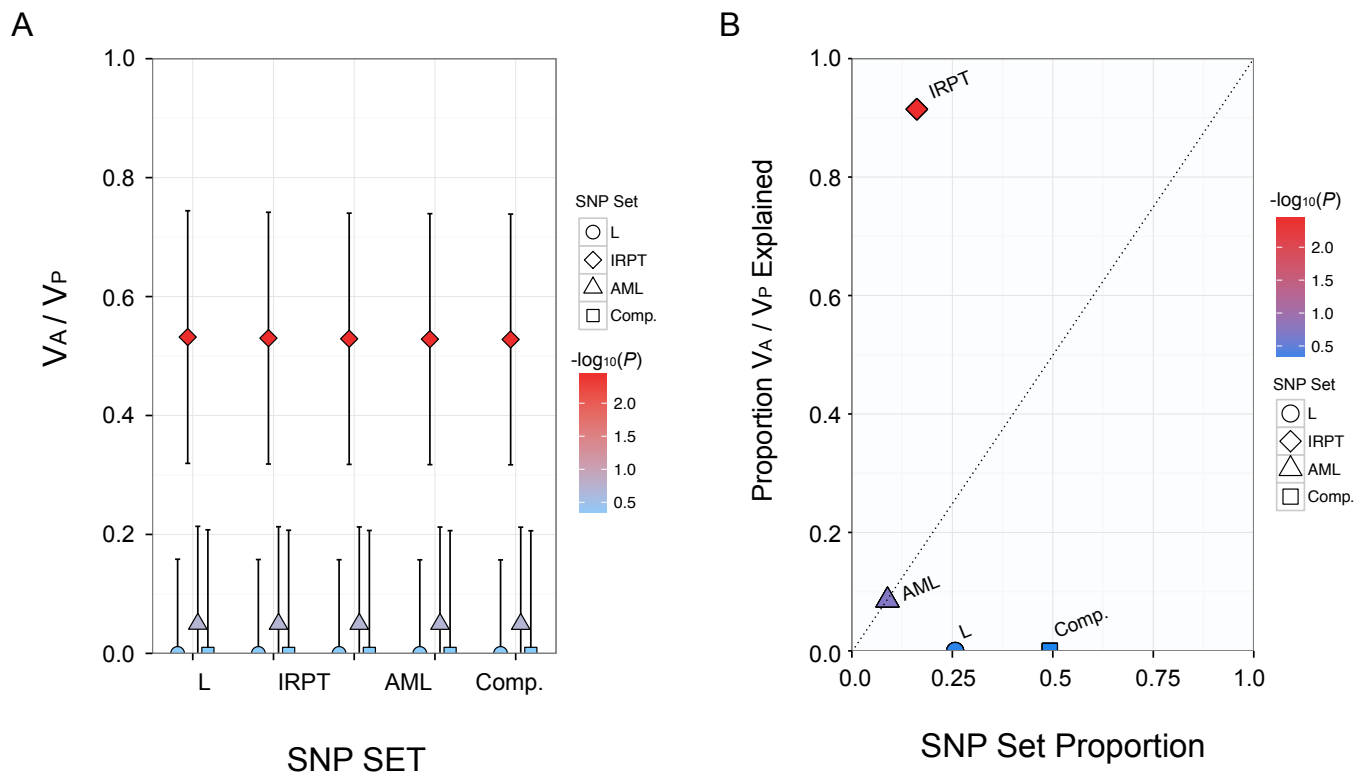

Figure S8. GRM-adjusted partition analysis of the merged Hispanic dataset. (A) The narrow-sense heritability estimates ( $V_A/V_P$ ) attributable to disjoint SNP subsets in the IRPT-LCL partition are shown at each assumed MAF threshold ( $\theta$ ) for causal variants and (B) proportion of explained variance by SNP set proportion for each subset are shown with color corresponding to  $-\log_{10}(p\text{-value})$ . The shape of each point designates the subset identity.



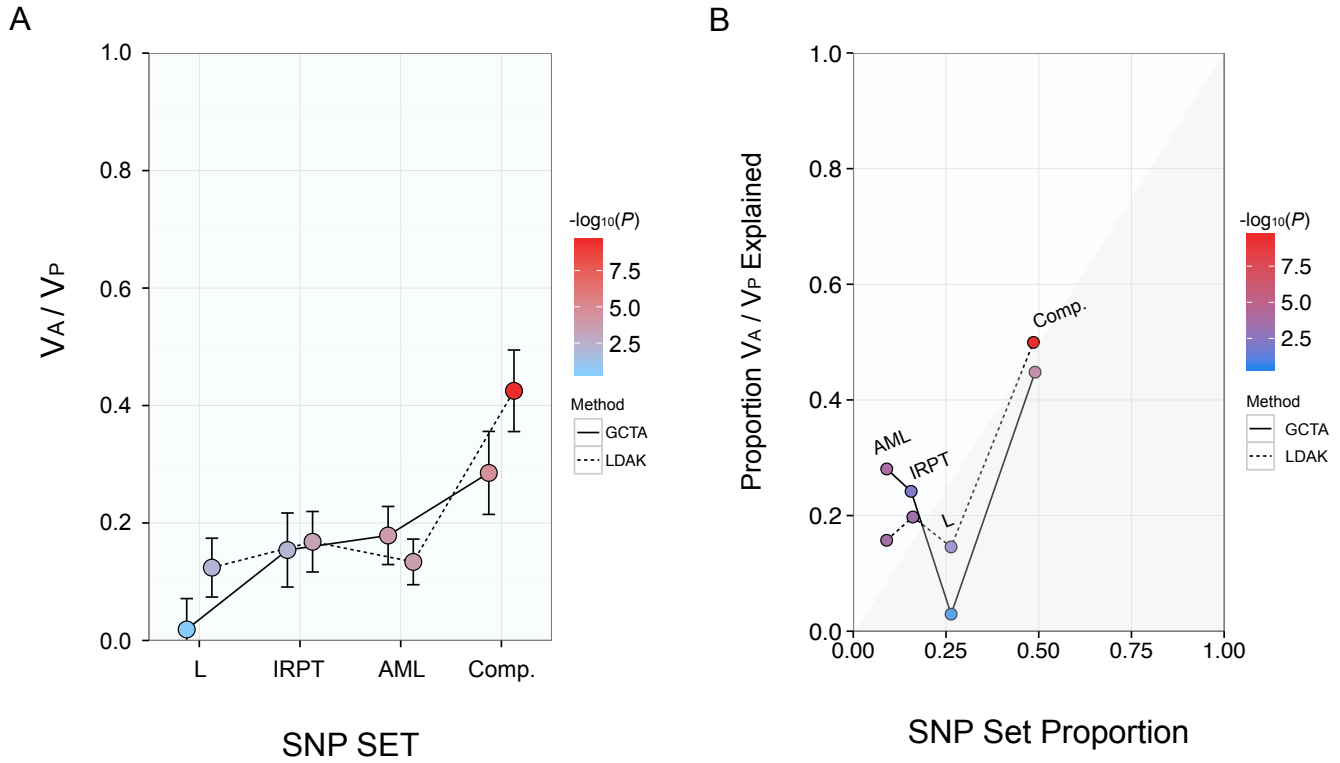

Figure S9. GRM-adjusted partition analysis of the WTCCC dataset. (A) The narrow-sense heritability estimates ( $V_A/V_P$ ) attributable to disjoint SNP subsets in the IRPT-LCL partition and (B) proportion of explained variance by SNP set proportion for each subset are shown with color corresponding to  $-\log_{10}(p)$ -value. Estimates corresponding to the unadjusted GRMs (GCTA) and LD-adjusted GRMs (LDAK) are designated by solid and dashed lines, respectively.

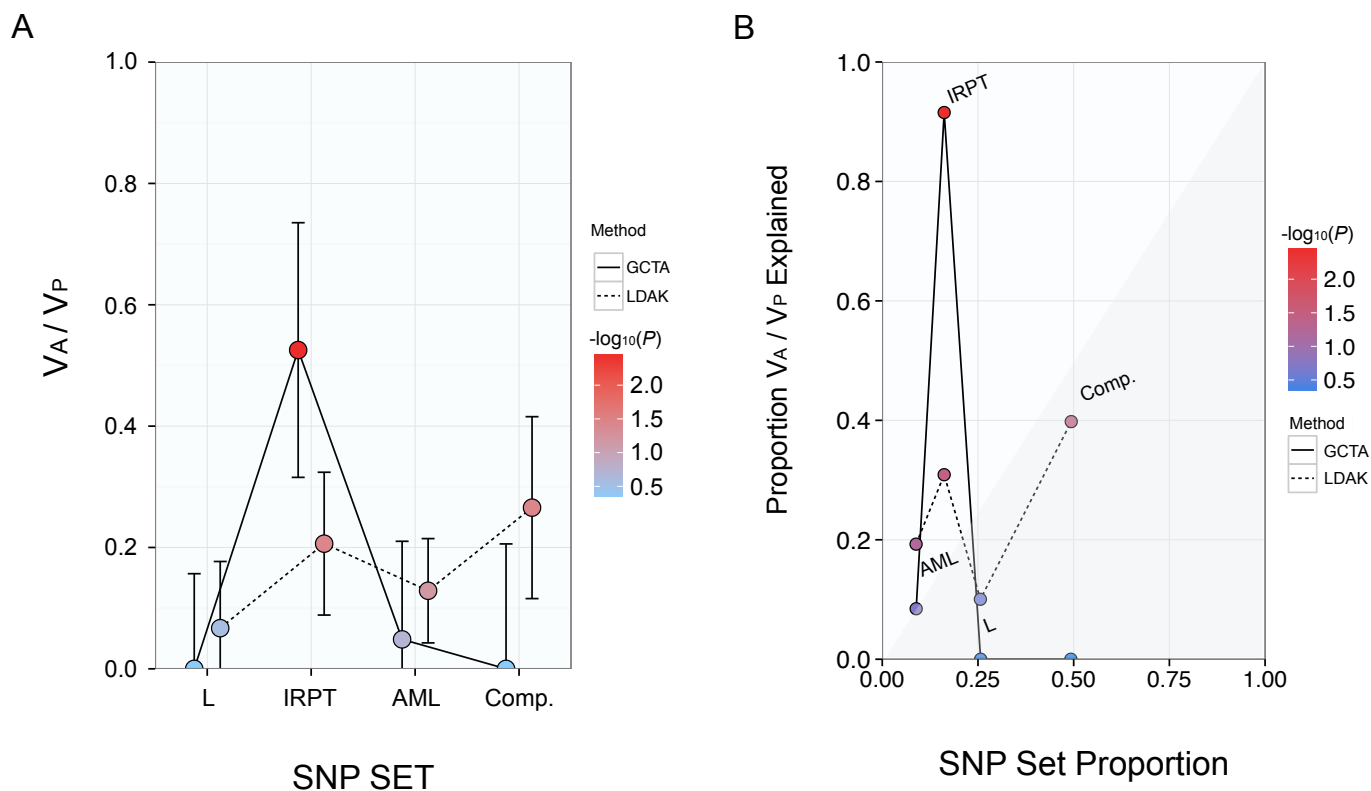

Figure S10. GRM-adjusted partition analysis of the merged Hispanic dataset. (A) The narrow-sense heritability estimates ( $V_A/V_P$ ) attributable to disjoint SNP subsets in the IRPT-LCL partition and (B) proportion of explained variance by SNP set proportion for each subset are shown with color corresponding to  $-\log_{10}(p\text{-value})$ . Estimates corresponding to the unadjusted GRMs (GCTA) and LD-adjusted GRMs (LDAK) are designated by solid and dashed lines, respectively.

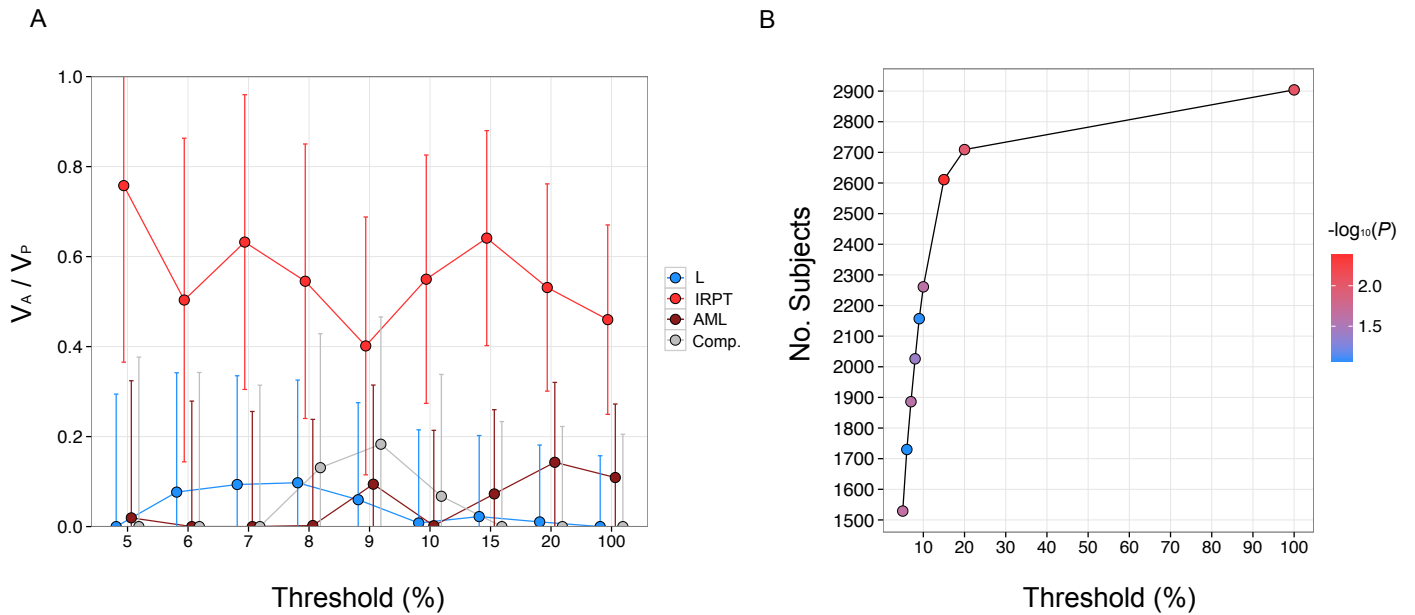

Figure S11. The effect of relatedness thresholds on an eQTL partition analysis of T2D heritability. (A) The IRPT-LCL eQTL partition analysis (explained in detail in the Methods section) was performed at various relatedness thresholds in the merged Hispanic dataset. The estimate of heritability ( $V_A/V_P$ ) is shown for each disjoint subset designated by color at each threshold. (B) The number of retained individuals at each threshold is shown with color corresponding to the significance ( $-\log_{10}(p\text{-value})$ ) of the  $V_A/V_P$  estimate for the insulin-responsive peripheral tissue (IRPT) subset.

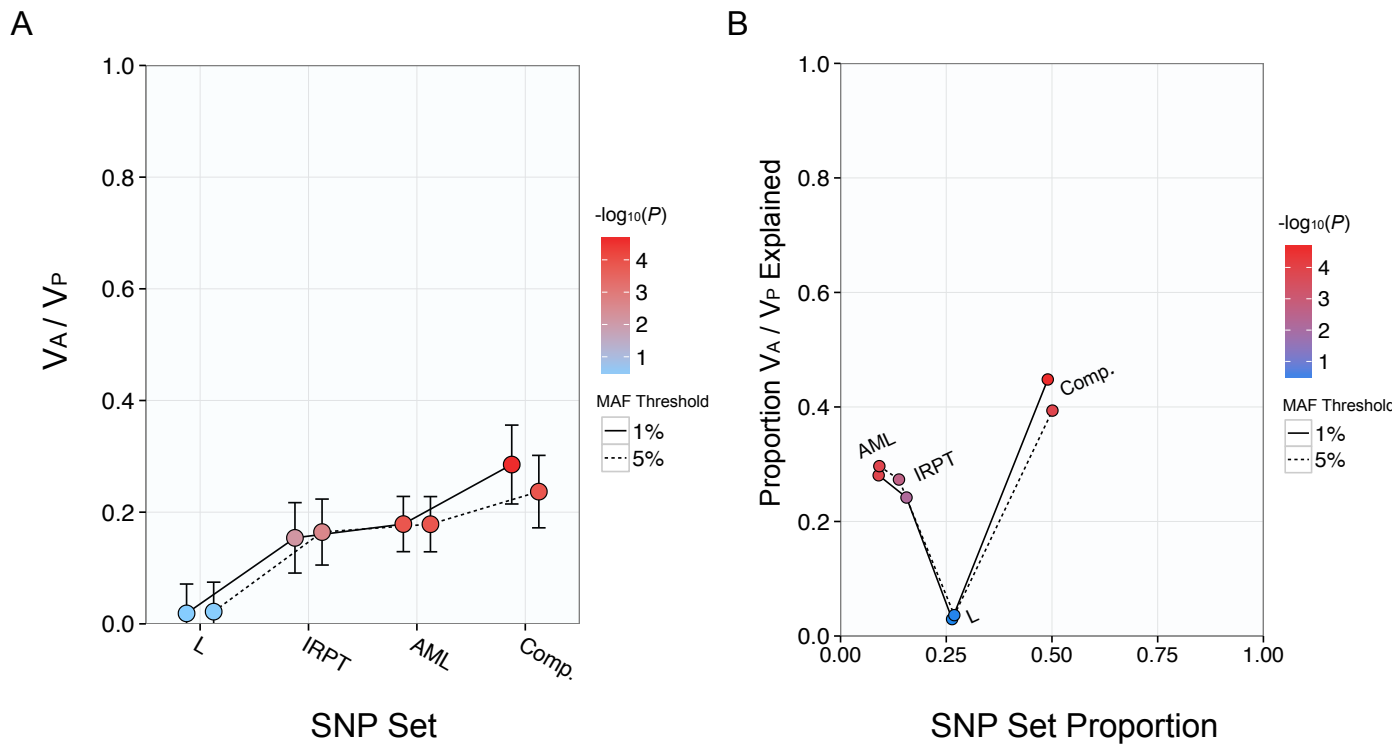

Figure S12. Effect of MAF threshold on partition analysis of the WTCCC dataset.. (A) The narrow-sense heritability estimates ( $V_A/V_P$ ) attributable to disjoint SNP subsets in the IRPT-LCL partition and (B) proportion of explained variance by SNP set proportion for each subset are shown with color corresponding to  $-\log_{10}(p\text{-value})$ . Solid and dashed lines indicate results from a joint analysis performed with a MAF threshold of 1% and 5%, respectively.

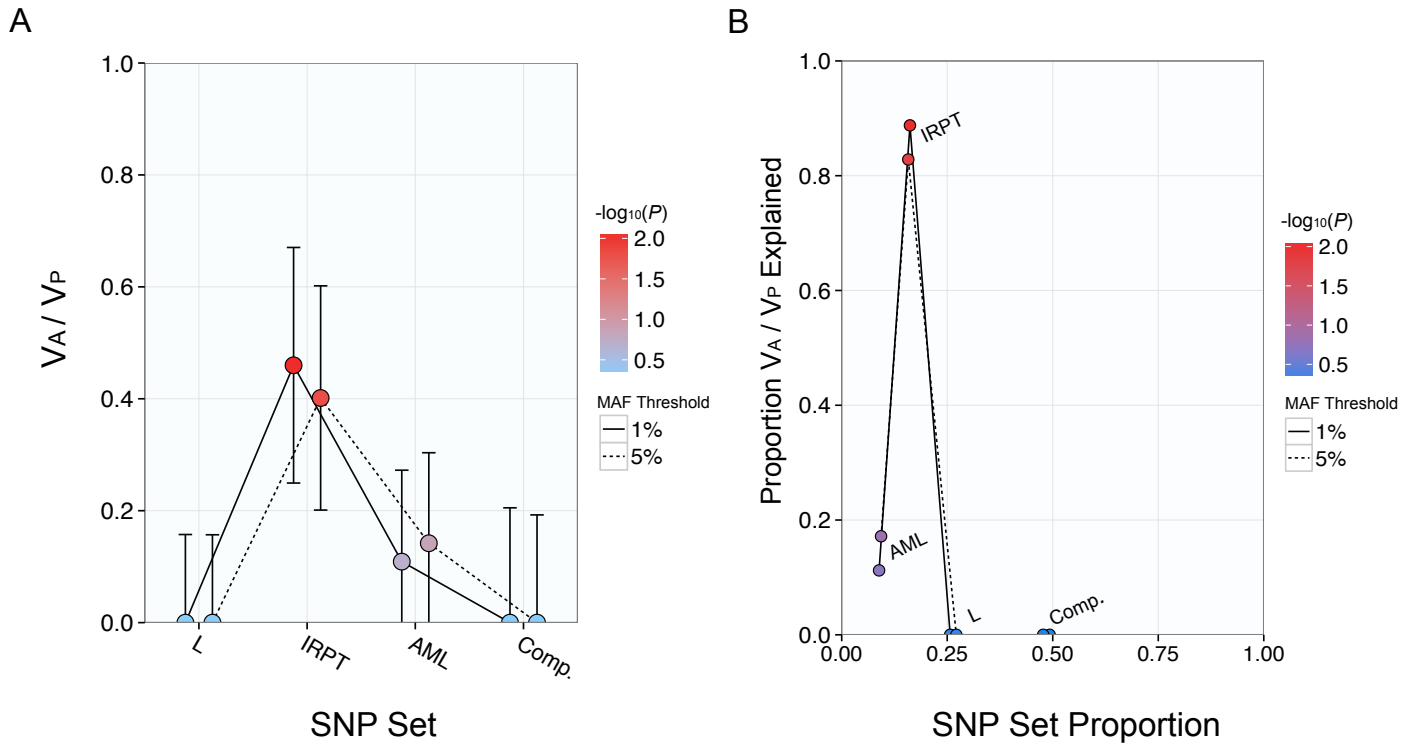

Figure S13. Effect of MAF threshold on partition analysis of the merged Hispanic dataset.. (A) The narrow-sense heritability estimates ( $V_A/V_P$ ) attributable to disjoint SNP subsets in the IRPT-LCL partition and (B) proportion of explained variance by SNP set proportion for each subset are shown with color corresponding to  $-\log_{10}(p\text{-value})$ . Solid and dashed lines indicate results from a joint analysis performed with a MAF threshold of 1% and 5%, respectively.

| Dataset      | Cases<br>( <i>n</i> ) | Controls<br>( <i>n</i> ) | Age<br>(years) | Sex<br>( <i>n</i> , female) | BMI<br>( <i>kg/m</i> <sup>2</sup> ) |
|--------------|-----------------------|--------------------------|----------------|-----------------------------|-------------------------------------|
| WTCCC        | 1,924                 | 2,938                    | NA             | 2,298                       | NA                                  |
| Starr County | 837                   | 781                      | 43.0 ± 11.0    | 1062                        | 31.0 ± 6.4                          |
| Mexico City  | 967                   | 343                      | 45.5 ± 7.3     | 833                         | 29.1 ± 4.6                          |

Table S1. Characteristics of study populations. Data are mean ± SD, unless otherwise indicated. NA, not available.

| Dataset         | $V_A/V_P$ | SE   | LRT   | P-value               | No. SNPs  | Prevalence |
|-----------------|-----------|------|-------|-----------------------|-----------|------------|
| WTCCC           | 0.60      | 0.06 | 98.24 | $1.9 \times 10^{-23}$ | 370,139   | 8%         |
| Starr County    | 0.56      | 0.15 | 13.50 | $1.2 \times 10^{-04}$ | 1,733,064 | 20%        |
| Mexico City     | 0.80      | 0.23 | 32.18 | $7.0 \times 10^{-09}$ | 2,431,591 | 10%        |
| Merged Hispanic | 0.60      | 0.11 | 32.79 | $5.0 \times 10^{-09}$ | 1,652,799 | 16%        |

Table S2. Estimates of narrow-sense heritability explained by GWAS-interrogated SNPs. REML estimates of phenotypic variance explained by the additive effect of GWAS SNPs are given with standard error (SE), LRT statistic, *p*-value, number of SNPs, and prevalence of T2D for the WTCCC, Starr County, Mexico City, and Merged Hispanic dataset.

| WTCCC              |         |      |        |                       |
|--------------------|---------|------|--------|-----------------------|
| Covariates         | $Va/Vp$ | SE   | LRT    | P-value               |
| —                  | 0.61    | 0.06 | 107.85 | $1.4 \times 10^{-25}$ |
| Sex                | 0.60    | 0.06 | 104.57 | $7.6 \times 10^{-25}$ |
| PC1-5              | 0.60    | 0.06 | 98.24  | $1.9 \times 10^{-23}$ |
| Sex+PC1-5          | 0.59    | 0.06 | 95.51  | $7.4 \times 10^{-23}$ |
| Sex+PC1-10         | 0.56    | 0.06 | 79.445 | $2.5 \times 10^{-19}$ |
| Starr County       |         |      |        |                       |
| Covariates         | $Va/Vp$ | SE   | LRT    | P-value               |
| —                  | 0.64    | 0.15 | 27.25  | $8.9 \times 10^{-08}$ |
| Sex                | 0.59    | 0.15 | 22.64  | $9.7 \times 10^{-07}$ |
| Age                | 0.65    | 0.15 | 21.85  | $1.5 \times 10^{-06}$ |
| BMI                | 0.64    | 0.15 | 26.66  | $1.2 \times 10^{-07}$ |
| PC1-5              | 0.59    | 0.15 | 17.88  | $1.2 \times 10^{-05}$ |
| Sex+Age            | 0.61    | 0.15 | 18.97  | $6.7 \times 10^{-06}$ |
| Sex+BMI            | 0.58    | 0.15 | 21.14  | $2.1 \times 10^{-06}$ |
| Age+BMI            | 0.64    | 0.15 | 21.65  | $1.6 \times 10^{-06}$ |
| Sex+Age+BMI        | 0.59    | 0.15 | 18.098 | $1.0 \times 10^{-05}$ |
| Sex+Age+BMI+PC1-5  | 0.56    | 0.15 | 13.50  | 0.0001                |
| Sex+Age+BMI+PC1-10 | 0.55    | 0.15 | 12.411 | 0.0002                |
| Mexico City        |         |      |        |                       |
| Covariates         | $Va/Vp$ | SE   | LRT    | P-value               |
| —                  | 1.07    | 0.22 | 82.95  | $4.2 \times 10^{-20}$ |
| Sex                | 1.07    | 0.22 | 79.63  | $2.3 \times 10^{-19}$ |
| Age                | 0.91    | 0.23 | 46.59  | $4.4 \times 10^{-12}$ |
| BMI                | 0.94    | 0.22 | 70.58  | $2.2 \times 10^{-17}$ |
| PC1-5              | 1.08    | 0.23 | 71.30  | $1.5 \times 10^{-17}$ |
| Sex+Age            | 0.95    | 0.23 | 46.52  | $4.5 \times 10^{-12}$ |
| Sex+BMI            | 0.96    | 0.22 | 69.41  | $4.0 \times 10^{-17}$ |
| Age+BMI            | 0.78    | 0.23 | 38.13  | $3.3 \times 10^{-10}$ |
| Sex+Age+BMI        | 0.84    | 0.23 | 38.92  | $2.2 \times 10^{-10}$ |
| Sex+Age+BMI+PC1-5  | 0.82    | 0.23 | 32.34  | $6.5 \times 10^{-09}$ |
| Sex+Age+BMI+PC1-10 | 0.80    | 0.23 | 32.18  | $7.0 \times 10^{-09}$ |

Table S3. Evaluation of covariates included in estimation of *chip* heritability. REML estimates of phenotypic variance explained by the additive effect of GWAS SNPs are given for each GWAS dataset with standard error (SE), LRT statistic, *p*-value, number of SNPs, and prevalence of T2D.

| WTCCC        |           |      |        |                       |          |
|--------------|-----------|------|--------|-----------------------|----------|
| Subset       | $V_a/V_p$ | SE   | LRT    | P-value               | No. SNPs |
| 1KB          | 0.05      | 0.01 | 150.09 | $8.3 \times 10^{-35}$ | 97       |
| 10KB         | 0.06      | 0.01 | 130.12 | $1.9 \times 10^{-30}$ | 429      |
| 100KB        | 0.09      | 0.01 | 106.47 | $2.9 \times 10^{-25}$ | 3043     |
| 500KB        | 0.12      | 0.02 | 64.31  | $5.3 \times 10^{-16}$ | 13931    |
| 1MB          | 0.16      | 0.02 | 62.65  | $1.2 \times 10^{-15}$ | 27116    |
| Starr County |           |      |        |                       |          |
| Subset       | $V_a/V_p$ | SE   | LRT    | P-value               | No. SNPs |
| 1KB          | 0.01      | 0.02 | 0.47   | 0.25                  | 268      |
| 10KB         | 0.02      | 0.02 | 0.70   | 0.20                  | 1546     |
| 100KB        | 0.09      | 0.04 | 5.57   | $9.1 \times 10^{-03}$ | 12063    |
| 500KB        | 0.19      | 0.06 | 11.64  | $3.2 \times 10^{-04}$ | 58852    |
| 1MB          | 0.20      | 0.08 | 8.47   | $1.8 \times 10^{-03}$ | 115591   |
| Mexico City  |           |      |        |                       |          |
| Subset       | $V_a/V_p$ | SE   | LRT    | P-value               | No. SNPs |
| 1KB          | 0.08      | 0.04 | 6.53   | $5.3 \times 10^{-03}$ | 445      |
| 10KB         | 0.07      | 0.04 | 3.79   | 0.03                  | 2684     |
| 100KB        | 0.05      | 0.05 | 1.08   | 0.15                  | 20347    |
| 500KB        | 0.23      | 0.09 | 6.80   | $4.6 \times 10^{-03}$ | 91926    |
| 1MB          | 0.23      | 0.11 | 4.57   | 0.02                  | 177167   |

Table S4. Estimates of narrow-sense heritability explained by subsets comprised of T2D-associated SNPs. Subsets are comprised of T2D-associated SNPs from the NHGRI catalogue and HapMap2 SNPs within 1KB, 10KB, 100KB, 500KB, and 1MB of the associated SNPs. REML estimates of phenotypic variance explained by the additive effect of SNPs from each subset are given with standard error (SE), LRT statistic,  $p$ -value, and number of SNPs. Results are listed for each GWAS dataset; WTCCC, SCT, MCM.



| <b>WTCCC</b> |                 |                           | <b>Hispanic</b> |                 |                           |
|--------------|-----------------|---------------------------|-----------------|-----------------|---------------------------|
| <b>Set</b>   | <b>No. SNPs</b> | <b>SNP Set Proportion</b> | <b>Set</b>      | <b>No. SNPs</b> | <b>SNP Set Proportion</b> |
| LCL          | 134,600         | 0.354                     | LCL             | 569,600         | 0.345                     |
| Adipose      | 72,290          | 0.190                     | Adipose         | 309,355         | 0.187                     |
| Muscle       | 60,691          | 0.160                     | Muscle          | 254,357         | 0.154                     |
| GWAS         | 380,660         | 1.00                      | GWAS            | 1,652,799       | 1.00                      |

Table S5. Proportion of SNPs designated as eQTLs in each GWAS dataset. The number of SNPs represented in the reference eQTL set and SNP set proportion are shown for each eQTL classification in the WTCCC and merged Hispanic datasets. There are a total of 838,302 SNPs, 616,455 SNPs, and 523,682 SNPs in the LCL adipose, and skeletal muscle eQTL reference sets, respectively.

| Subset     | $V_a/V_p$ | SE   | LRT   | P-value               | SNP Set Proportion | Proportion of <i>Chip</i> Heritability | Factor |
|------------|-----------|------|-------|-----------------------|--------------------|----------------------------------------|--------|
| L          | 0.02      | 0.05 | 0.12  | 0.36                  | 0.27               | 0.03                                   | 0.1    |
| IRPT       | 0.13      | 0.05 | 6.16  | $6.5 \times 10^{-03}$ | 0.16               | 0.24                                   | 1.4    |
| AML        | 0.15      | 0.04 | 13.36 | $1.3 \times 10^{-04}$ | 0.09               | 0.28                                   | 2.8    |
| Complement | 0.25      | 0.06 | 16.46 | $2.5 \times 10^{-05}$ | 0.48               | 0.45                                   | 0.9    |

Table S6. Estimates of narrow-sense heritability explained by eQTL subsets in the WTCCC dataset. REML estimates of phenotypic variance explained by the additive effect of SNPs from each subset are given with standard error (SE), LRT statistic,  $p$ -value, SNP set proportion, and proportion of *chip* heritability explained. Factor relates SNP set proportion to proportion of *chip* heritability explained.

| Subset     | $V_a/V_p$ | SE   | LRT   | P-value               | SNP Set Proportion | Proportion of <i>Chip</i> Heritability | Factor |
|------------|-----------|------|-------|-----------------------|--------------------|----------------------------------------|--------|
| L          | 0.01      | 0.04 | 0.08  | 0.39                  | 0.27               | 0.02                                   | 0.1    |
| A          | 0.02      | 0.03 | 0.35  | 0.28                  | 0.06               | 0.03                                   | 0.6    |
| M          | 0.05      | 0.03 | 3.36  | 0.03                  | 0.04               | 0.09                                   | 2.3    |
| AM         | 0.09      | 0.04 | 5.06  | 0.01                  | 0.10               | 0.17                                   | 1.6    |
| AML        | 0.13      | 0.04 | 12.89 | $1.6 \times 10^{-04}$ | 0.06               | 0.23                                   | 3.6    |
| Complement | 0.24      | 0.06 | 16.54 | $2.4 \times 10^{-05}$ | 0.48               | 0.44                                   | 0.9    |

Table S7. Expanded IRPT-LCL analysis of the WTCCC dataset. REML estimates of phenotypic variance explained by the additive effect of SNPs from each subset are given with standard error (SE), LRT statistic,  $p$ -value, SNP set proportion, and proportion of *chip* heritability explained. Factor relates SNP set proportion to proportion of *chip* heritability explained.

| Subset      | $V_a/V_p$ | SE   | LRT   | P-value               | SNP Set Proportion | Proportion of <i>Chip</i> Heritability | Factor |
|-------------|-----------|------|-------|-----------------------|--------------------|----------------------------------------|--------|
| A $\cup$ AL | 0.11      | 0.05 | 5.06  | 0.01                  | 0.09               | 0.17                                   | 2.0    |
| M $\cup$ ML | 0.18      | 0.04 | 9.0   | $1.4 \times 10^{-03}$ | 0.06               | 0.19                                   | 3.2    |
| Complement  | 0.39      | 0.08 | 27.31 | $8.7 \times 10^{-08}$ | 0.85               | 0.63                                   | 0.7    |

Table S8. Index subset analysis of the WTCCC dataset. REML estimates of phenotypic variance explained by the additive effect of SNPs from each subset are given with standard error (SE), LRT statistic,  $p$ -value, SNP set proportion, and proportion of *chip* heritability explained. Factor relates SNP set proportion to proportion of *chip* heritability explained.

| Subset     | $V_a/V_p$ | SE   | LRT   | P-value | SNP Set Proportion | Proportion of <i>Chip</i> Heritability | Factor |
|------------|-----------|------|-------|---------|--------------------|----------------------------------------|--------|
| L          | 0.02      | 0.05 | 0.09  | 0.39    | 0.26               | 0.02                                   | 0.1    |
| A          | 0.02      | 0.04 | 0.35  | 0.28    | 0.05               | 0.03                                   | 0.6    |
| M          | 0.06      | 0.03 | 3.39  | 0.03    | 0.04               | 0.09                                   | 2.6    |
| AL         | 0.09      | 0.03 | 8.21  | 0.00    | 0.03               | 0.14                                   | 4.1    |
| ML         | 0.06      | 0.03 | 4.98  | 0.01    | 0.02               | 0.09                                   | 3.8    |
| AM         | 0.08      | 0.04 | 3.55  | 0.03    | 0.07               | 0.12                                   | 1.9    |
| AML        | 0.03      | 0.03 | 1.26  | 0.13    | 0.03               | 0.05                                   | 1.6    |
| Complement | 0.28      | 0.07 | 16.03 | 0.00    | 0.49               | 0.44                                   | 0.9    |

Table S9. Baseline subset analysis of the WTCCC dataset. REML estimates of phenotypic variance explained by the additive effect of SNPs from each subset are given with standard error (SE), LRT statistic,  $p$ -value, SNP set proportion, and proportion of *chip* heritability explained. Factor relates SNP set proportion to proportion of *chip* heritability explained.

| Subset     | $V_a/V_p$ | SE   | LRT   | P-value               | SNP Set Proportion | Proportion of <i>Chip</i> Heritability | Factor |
|------------|-----------|------|-------|-----------------------|--------------------|----------------------------------------|--------|
| M          | 0.07      | 0.03 | 4.53  | 0.02                  | 0.04               | 0.11                                   | 3.1    |
| CT         | 0.23      | 0.06 | 14.94 | $5.5 \times 10^{-05}$ | 0.16               | 0.37                                   | 2.5    |
| Complement | 0.32      | 0.07 | 19.80 | $4.3 \times 10^{-06}$ | 0.80               | 0.52                                   | 0.7    |

Table S10. Index subset analysis of the WTCCC dataset. REML estimates of phenotypic variance explained by the additive effect of SNPs from each subset are given with standard error (SE), LRT statistic,  $p$ -value, SNP set proportion, and proportion of *chip* heritability explained. Factor relates SNP set proportion to proportion of *chip* heritability explained. M and CT denote muscle-specific and cross-tissue eQTL subsets, respectively.

| Subset                  | $V_a/V_p$ | SE   | LRT   | P-value               | SNP Set Proportion | Proportion of <i>Chip</i> Heritability | Factor |
|-------------------------|-----------|------|-------|-----------------------|--------------------|----------------------------------------|--------|
| A $\cup$ M $\cup$ AM    | 0.18      | 0.06 | 8.83  | $1.5 \times 10^{-03}$ | 0.16               | 0.29                                   | 1.8    |
| AL $\cup$ ML $\cup$ AML | 0.15      | 0.05 | 10.43 | $6.2 \times 10^{-03}$ | 0.09               | 0.24                                   | 2.7    |
| Complement              | 0.30      | 0.08 | 15.59 | $3.9 \times 10^{-05}$ | 0.75               | 0.48                                   | 0.6    |

Table S11. Index subset analysis of the WTCCC dataset. REML estimates of phenotypic variance explained by the additive effect of SNPs from each subset are given with standard error (SE), LRT statistic,  $p$ -value, SNP set proportion, and proportion of *chip* heritability explained. Factor relates SNP set proportion to proportion of *chip* heritability explained.

| Subset     | $V_a/V_p$ | SE   | LRT   | P-value               | SNP Set Proportion | Proportion of <i>Chip</i> Heritability | Factor |
|------------|-----------|------|-------|-----------------------|--------------------|----------------------------------------|--------|
| L          | 0.00      | 0.04 | 0.00  | 0.50                  | 0.16               | 0.00                                   | 0.0    |
| CT         | 0.24      | 0.06 | 16.98 | $1.9 \times 10^{-05}$ | 0.16               | 0.38                                   | 2.4    |
| Complement | 0.40      | 0.07 | 33.51 | $3.5 \times 10^{-09}$ | 0.68               | 0.62                                   | 0.9    |

Table S12. *chip* heritability explained by matched sets of LCL-specific and cross-tissue eQTLs in the WTCCC dataset. In this analysis, the L subset contained the set of the most significant LCL-specific eQTLs so that the SNP set proportion was identical to that of the Cross-tissue set. REML estimates of phenotypic variance explained by the additive effect of GWAS SNPs are given for each GWAS dataset with standard error (SE), LRT statistic,  $p$ -value, number of SNPs, and prevalence of T2D.

| Subset                        | $V_a/V_p$ | SE   | LRT   | P-value               | SNP Set Proportion | Proportion of <i>Chip</i> Heritability | Factor |
|-------------------------------|-----------|------|-------|-----------------------|--------------------|----------------------------------------|--------|
| Cross Tissue ( <i>Cis</i> )   | 0.02      | 0.02 | 2.47  | 0.06                  | 0.01               | 0.04                                   | 3.9    |
| Cross Tissue ( <i>Trans</i> ) | 0.21      | 0.06 | 11.78 | $3.0 \times 10^{-04}$ | 0.15               | 0.33                                   | 2.3    |
| Complement                    | 0.39      | 0.07 | 29.45 | $2.9 \times 10^{-08}$ | 0.84               | 0.63                                   | 0.7    |

Table S13. Cis-trans analysis of cross-tissue eQTLs in the WTCCC dataset. REML estimates of phenotypic variance explained by the additive effect of SNPs from each subset are given with standard error (SE), LRT statistic,  $p$ -value, SNP set proportion, and proportion of *chip* heritability explained. Factor relates SNP set proportion to proportion of *chip* heritability explained.

| Subset                  | $V_a/V_p$ | SE    | LRT   | P-value               | SNP Set Proportion | Proportion of <i>Chip</i> Heritability | Factor |
|-------------------------|-----------|-------|-------|-----------------------|--------------------|----------------------------------------|--------|
| Muscle ( <i>Cis</i> )   | 0.0009    | 0.004 | 0.06  | 0.40                  | 0.0008             | 0.002                                  | 2.2    |
| Muscle ( <i>Trans</i> ) | 0.06      | 0.03  | 4.29  | 0.02                  | 0.04               | 0.11                                   | 3.1    |
| Complement              | 0.46      | 0.06  | 68.53 | $6.3 \times 10^{-17}$ | 0.96               | 0.89                                   | 0.9    |

Table S14. Cis-trans analysis of muscle-specific eQTLs in the WTCCC dataset. REML estimates of phenotypic variance explained by the additive effect of SNPs from each subset are given with standard error (SE), LRT statistic,  $p$ -value, SNP set proportion, and proportion of *chip* heritability explained. Factor relates SNP set proportion to proportion of *chip* heritability explained.

| Subset     | $V_a/V_p$ | SE   | LRT  | P-value | SNP Set Proportion | Proportion of <i>Chip</i> Heritability | Factor |
|------------|-----------|------|------|---------|--------------------|----------------------------------------|--------|
| L          | 0.00      | 0.27 | 0.00 | 0.49    | 0.26               | 0.00                                   | 0.0    |
| A          | 0.08      | 0.25 | 0.05 | 0.41    | 0.06               | 0.12                                   | 2.2    |
| M          | 0.27      | 0.20 | 2.17 | 0.07    | 0.04               | 0.41                                   | 11.4   |
| AM         | 0.26      | 0.27 | 0.83 | 0.18    | 0.09               | 0.39                                   | 4.5    |
| AML        | 0.06      | 0.26 | 0.69 | 0.20    | 0.06               | 0.08                                   | 1.5    |
| Complement | 0.00      | 0.35 | 0.00 | 0.50    | 0.50               | 0.00                                   | 0.0    |

Table S15. Expanded IRPT-LCL analysis of the SCT dataset. REML estimates of phenotypic variance explained by the additive effect of SNPs from each subset are given with standard error (SE), LRT statistic,  $p$ -value, SNP set proportion, and proportion of *chip* heritability explained. Factor relates SNP set proportion to proportion of *chip* heritability explained.

| Subset     | $V_a/V_p$ | SE   | LRT  | P-value | SNP Set Proportion | Proportion of <i>Chip</i> Heritability | Factor |
|------------|-----------|------|------|---------|--------------------|----------------------------------------|--------|
| L          | 0.10      | 0.41 | 0.00 | 0.50    | 0.23               | 0.10                                   | 0.4    |
| A          | 0.00      | 0.40 | 0.00 | 0.50    | 0.06               | 0.00                                   | 0.0    |
| M          | 0.25      | 0.31 | 3.19 | 0.04    | 0.04               | 0.25                                   | 7.1    |
| AM         | 0.48      | 0.47 | 0.00 | 0.50    | 0.10               | 0.49                                   | 4.9    |
| AML        | 0.00      | 0.43 | 0.00 | 0.50    | 0.05               | 0.00                                   | 0.0    |
| Complement | 0.15      | 0.58 | 0.00 | 0.50    | 0.52               | 0.16                                   | 0.3    |

Table S16. Expanded IRPT-LCL analysis of the MCM dataset. REML estimates of phenotypic variance explained by the additive effect of SNPs from each subset are given with standard error (SE), LRT statistic,  $p$ -value, SNP set proportion, and proportion of *chip* heritability explained. Factor relates SNP set proportion to proportion of *chip* heritability explained.

| WTCCC          |           |      |       |                       |
|----------------|-----------|------|-------|-----------------------|
| Prevalence (%) | $V_a/V_p$ | SE   | LRT   | P-value               |
| 5              | 0.52      | 0.05 | 98.24 | $1.9 \times 10^{-23}$ |
| 10             | 0.64      | 0.07 | 98.24 | $1.9 \times 10^{-23}$ |
| 15             | 0.73      | 0.08 | 98.24 | $1.9 \times 10^{-23}$ |
| 20             | 0.79      | 0.08 | 98.24 | $1.9 \times 10^{-23}$ |
| 25             | 0.85      | 0.09 | 98.24 | $1.9 \times 10^{-23}$ |
| Starr County   |           |      |       |                       |
| Prevalence (%) | $V_a/V_p$ | SE   | LRT   | P-value               |
| 5              | 0.37      | 0.10 | 13.50 | 0.0001                |
| 10             | 0.45      | 0.12 | 13.50 | 0.0001                |
| 15             | 0.52      | 0.14 | 13.50 | 0.0001                |
| 20             | 0.56      | 0.15 | 13.50 | 0.0001                |
| 25             | 0.60      | 0.16 | 13.50 | 0.0001                |
| Mexico City    |           |      |       |                       |
| Prevalence (%) | $V_a/V_p$ | SE   | LRT   | P-value               |
| 5              | 0.65      | 0.19 | 32.18 | $7.0 \times 10^{-09}$ |
| 10             | 0.80      | 0.23 | 32.18 | $7.0 \times 10^{-09}$ |
| 15             | 0.92      | 0.27 | 32.18 | $7.0 \times 10^{-09}$ |
| 20             | 1.00      | 0.29 | 32.18 | $7.0 \times 10^{-09}$ |
| 25             | 1.07      | 0.31 | 32.18 | $7.0 \times 10^{-09}$ |

Table S17. Evaluation of the prevalence parameter specified in the estimation of *chip* heritability. REML estimates of phenotypic variance explained by the additive effect of GWAS SNPs are given for each GWAS dataset with standard error (SE), LRT statistic, *p*-value, number of SNPs, and prevalence of T2D.



| Subset     | $V_a/V_p$ | SE   | LRT  | P-value | SNP Set Proportion | Proportion of <i>Chip</i> Heritability | Factor |
|------------|-----------|------|------|---------|--------------------|----------------------------------------|--------|
| L          | 0.00      | 0.16 | 0.01 | 0.47    | 0.26               | 0.00                                   | 0.0    |
| IRPT       | 0.46      | 0.21 | 5.60 | 0.01    | 0.16               | 0.81                                   | 5.0    |
| AML        | 0.11      | 0.16 | 0.72 | 0.20    | 0.09               | 0.19                                   | 2.2    |
| Complement | 0.00      | 0.21 | 0.00 | 0.50    | 0.49               | 0.00                                   | 0.0    |

Table S18. Estimates of narrow-sense heritability explained by eQTL subsets in the merged Hispanic dataset. REML estimates of phenotypic variance explained by the additive effect of SNPs from each subset are given with standard error (SE), LRT statistic,  $p$ -value, SNP set proportion, and proportion of *chip* heritability explained. Factor relates SNP set proportion to proportion of *chip* heritability explained

| Subset     | $V_a/V_p$ | SE   | LRT  | P-value | SNP Set Proportion | Proportion of <i>Chip</i> Heritability | Factor |
|------------|-----------|------|------|---------|--------------------|----------------------------------------|--------|
| L          | 0.00      | 0.16 | 0.00 | 0.50    | 0.26               | 0.00                                   | 0.0    |
| A          | 0.22      | 0.14 | 3.26 | 0.04    | 0.06               | 0.38                                   | 6.3    |
| M          | 0.00      | 0.11 | 0.00 | 0.50    | 0.04               | 0.00                                   | 0.0    |
| AM         | 0.27      | 0.15 | 3.54 | 0.03    | 0.09               | 0.48                                   | 5.2    |
| AML        | 0.08      | 0.15 | 0.60 | 0.22    | 0.06               | 0.15                                   | 2.4    |
| Complement | 0.00      | 0.20 | 0.01 | 0.45    | 0.49               | 0.00                                   | 0.0    |

Table S19. Expanded IRPT-LCL analysis of the merged Hispanic dataset. REML estimates of phenotypic variance explained by the additive effect of SNPs from each subset are given with standard error (SE), LRT statistic,  $p$ -value, SNP set proportion, and proportion of *chip* heritability explained. Factor relates SNP set proportion to proportion of *chip* heritability explained.

| Subset     | $V_a/V_p$ | SE   | LRT  | P-value | SNP Set Proportion | Proportion of <i>Chip</i> Heritability | Factor |
|------------|-----------|------|------|---------|--------------------|----------------------------------------|--------|
| L          | 0.00      | 0.16 | 0.03 | 0.43    | 0.26               | 0.00                                   | 0.0    |
| A          | 0.20      | 0.14 | 2.65 | 0.05    | 0.06               | 0.36                                   | 6.0    |
| M          | 0.00      | 0.11 | 0.00 | 0.48    | 0.04               | 0.00                                   | 0.0    |
| AL         | 0.05      | 0.11 | 0.24 | 0.31    | 0.04               | 0.08                                   | 2.2    |
| ML         | 0.03      | 0.09 | 0.09 | 0.38    | 0.02               | 0.05                                   | 1.9    |
| AM         | 0.30      | 0.14 | 5.55 | 0.01    | 0.06               | 0.52                                   | 8.3    |
| AML        | 0.00      | 0.10 | 0.00 | 0.50    | 0.03               | 0.00                                   | 0.0    |
| Complement | 0.00      | 0.21 | 0.00 | 0.50    | 0.49               | 0.00                                   | 0.0    |

Table S20. Baseline subset analysis of the merged Hispanic dataset. REML estimates of phenotypic variance explained by the additive effect of SNPs from each subset are given with standard error (SE), LRT statistic,  $p$ -value, SNP set proportion, and proportion of *chip* heritability explained. Factor relates SNP set proportion to proportion of *chip* heritability explained.

| Subset     | $V_a/V_p$ | SE   | LRT  | P-value | SNP Set Proportion | Proportion of <i>Chip</i> Heritability | Factor |
|------------|-----------|------|------|---------|--------------------|----------------------------------------|--------|
| M          | 0.00      | 0.11 | 0.00 | 0.50    | 0.04               | 0.00                                   | 0.0    |
| CT         | 0.45      | 0.19 | 5.93 | 0.01    | 0.15               | 0.89                                   | 5.9    |
| Complement | 0.05      | 0.20 | 0.05 | 0.41    | 0.81               | 0.11                                   | 0.1    |

Table S21. Index subset analysis of the merged Hispanic dataset. REML estimates of phenotypic variance explained by the additive effect of SNPs from each subset are given with standard error (SE), LRT statistic,  $p$ -value, SNP set proportion, and proportion of *chip* heritability explained. Factor relates SNP set proportion to proportion of *chip* heritability explained. M and CT denote muscle-specific and cross-tissue eQTL subsets, respectively.

| Subset     | $V_a/V_p$ | SE   | LRT  | P-value | SNP Set Proportion | Proportion of <i>Chip</i> Heritability | Factor |
|------------|-----------|------|------|---------|--------------------|----------------------------------------|--------|
| A          | 0.21      | 0.13 | 3.10 | 0.04    | 0.06               | 0.36                                   | 6.0    |
| CT         | 0.37      | 0.19 | 4.37 | 0.02    | 0.15               | 0.64                                   | 4.2    |
| Complement | 0.00      | 0.21 | 0.00 | 0.50    | 0.79               | 0.00                                   | 0.0    |

Table S22. Index subset analysis of the merged Hispanic dataset. REML estimates of phenotypic variance explained by the additive effect of SNPs from each subset are given with standard error (SE), LRT statistic,  $p$ -value, SNP set proportion, and proportion of *chip* heritability explained. Factor relates SNP set proportion to proportion of *chip* heritability explained. A and CT denote adipose-specific and cross-tissue eQTL subsets, respectively.

| Subset      | $V_a/V_p$ | SE   | LRT  | P-value | SNP Set Proportion | Proportion of <i>Chip</i> Heritability | Factor |
|-------------|-----------|------|------|---------|--------------------|----------------------------------------|--------|
| A $\cup$ AL | 0.32      | 0.16 | 4.35 | 0.02    | 0.10               | 0.63                                   | 6.5    |
| M $\cup$ ML | 0.05      | 0.13 | 0.12 | 0.36    | 0.06               | 0.09                                   | 1.4    |
| Complement  | 0.14      | 0.21 | 0.47 | 0.25    | 0.84               | 0.28                                   | 0.34   |

Table S23. Index subset analysis of the merged Hispanic dataset. REML estimates of phenotypic variance explained by the additive effect of SNPs from each subset are given with standard error (SE), LRT statistic,  $p$ -value, SNP set proportion, and proportion of *chip* heritability explained. Factor relates SNP set proportion to proportion of *chip* heritability explained.

| Subset                  | $V_a/V_p$             | SE   | LRT  | P-value               | SNP Set Proportion | Proportion of <i>Chip</i> Heritability | Factor          |
|-------------------------|-----------------------|------|------|-----------------------|--------------------|----------------------------------------|-----------------|
| A $\cup$ M $\cup$ AM    | 0.53                  | 0.19 | 8.29 | $1.2 \times 10^{-03}$ | 0.16               | 0.91                                   | 5.6             |
| AL $\cup$ ML $\cup$ AML | 0.05                  | 0.14 | 0.10 | 0.38                  | 0.09               | 0.09                                   | 1.0             |
| Complement              | $1.0 \times 10^{-06}$ | 0.22 | 0.00 | 0.50                  | 0.75               | $1.7 \times 10^{-06}$                  | $2.3 \times 10$ |

Table S24. Index subset analysis of the merged Hispanic dataset. REML estimates of phenotypic variance explained by the additive effect of SNPs from each subset are given with standard error (SE), LRT statistic,  $p$ -value, SNP set proportion, and proportion of *chip* heritability explained. Factor relates SNP set proportion to proportion of *chip* heritability explained.

| Subset     | $V_a/V_p$ | SE   | LRT   | P-value               | SNP Set Proportion | Proportion of <i>Chip</i> Heritability | Factor |
|------------|-----------|------|-------|-----------------------|--------------------|----------------------------------------|--------|
| L          | 0.01      | 0.13 | 0.01  | 0.47                  | 0.26               | 0.02                                   | 0.1    |
| Complement | 0.48      | 0.16 | 8.896 | $1.4 \times 10^{-03}$ | 0.74               | 0.98                                   | 1.3    |

Table S25. Index subset analysis of the merged Hispanic dataset. REML estimates of phenotypic variance explained by the additive effect of SNPs from each subset are given with standard error (SE), LRT statistic,  $p$ -value, SNP set proportion, and proportion of *chip* heritability explained. Factor relates SNP set proportion to proportion of *chip* heritability explained. L denotes LCL-specific eQTL subset.

| Subset     | $V_a/V_p$ | SE   | LRT  | P-value | SNP Set Proportion | Proportion of <i>Chip</i> Heritability | Factor |
|------------|-----------|------|------|---------|--------------------|----------------------------------------|--------|
| M          | 0.00      | 0.19 | 0.00 | 0.50    | 0.04               | 0.00                                   | 0.0    |
| CT         | 0.46      | 0.32 | 2.32 | 0.06    | 0.15               | 0.65                                   | 4.3    |
| Complement | 0.25      | 0.36 | 0.24 | 0.31    | 0.81               | 0.35                                   | 0.4    |

Table S26. Index subset analysis of the merged Hispanic dataset with BMI < 30. REML estimates of phenotypic variance explained by the additive effect of SNPs from each subset are given with standard error (SE), LRT statistic,  $p$ -value, SNP set proportion, and proportion of *chip* heritability explained. Factor relates SNP set proportion to proportion of *chip* heritability explained. M and CT denote muscle-specific and cross-tissue eQTL subsets, respectively.

| Subset     | $V_a/V_p$ | SE   | LRT  | P-value | SNP Set Proportion | Proportion of <i>Chip</i> Heritability | Factor |
|------------|-----------|------|------|---------|--------------------|----------------------------------------|--------|
| A          | 0.01      | 0.23 | 0.00 | 0.48    | 0.06               | 0.02                                   | 0.3    |
| CT         | 0.50      | 0.32 | 2.45 | 0.06    | 0.15               | 0.76                                   | 5.0    |
| Complement | 0.15      | 0.37 | 0.15 | 0.35    | 0.79               | 0.22                                   | 0.3    |

Table S27. Index subset analysis of the merged Hispanic dataset with BMI < 30. REML estimates of phenotypic variance explained by the additive effect of SNPs from each subset are given with standard error (SE), LRT statistic,  $p$ -value, SNP set proportion, and proportion of *chip* heritability explained. Factor relates SNP set proportion to proportion of *chip* heritability explained. A and CT denote adipose-specific and cross-tissue eQTL subsets, respectively.

| Subset     | $V_a/V_p$ | SE   | LRT  | P-value | SNP Set Proportion | Proportion of <i>Chip</i> Heritability | Factor |
|------------|-----------|------|------|---------|--------------------|----------------------------------------|--------|
| M          | 0.06      | 0.25 | 0.06 | 0.41    | 0.04               | 0.08                                   | 2.2    |
| CT         | 0.25      | 0.42 | 0.34 | 0.28    | 0.15               | 0.34                                   | 2.3    |
| Complement | 0.42      | 0.45 | 0.91 | 0.17    | 0.81               | 0.57                                   | 0.7    |

Table S28. Index subset analysis of the merged Hispanic dataset with BMI  $\geq$  30. REML estimates of phenotypic variance explained by the additive effect of SNPs from each subset are given with standard error (SE), LRT statistic,  $p$ -value, SNP set proportion, and proportion of *chip* heritability explained. Factor relates SNP set proportion to proportion of *chip* heritability explained. M and CT denote muscle-specific and cross-tissue eQTL subsets, respectively.

| Subset     | $V_a/V_p$ | SE   | LRT  | P-value | SNP Set Proportion | Proportion of <i>Chip</i> Heritability | Factor |
|------------|-----------|------|------|---------|--------------------|----------------------------------------|--------|
| A          | 0.65      | 0.31 | 4.15 | 0.02    | 0.06               | 0.80                                   | 13.3   |
| CT         | 0.11      | 0.42 | 0.07 | 0.40    | 0.15               | 0.14                                   | 0.9    |
| Complement | 0.05      | 0.45 | 0.01 | 0.46    | 0.79               | 0.06                                   | 0.1    |

Table S29. Index subset analysis of the merged Hispanic dataset with BMI  $\geq$  30. REML estimates of phenotypic variance explained by the additive effect of SNPs from each subset are given with standard error (SE), LRT statistic,  $p$ -value, SNP set proportion, and proportion of *chip* heritability explained. Factor relates SNP set proportion to proportion of *chip* heritability explained. A and CT denote adipose-specific and cross-tissue eQTL subsets, respectively.

| Subset     | $V_a/V_p$ | SE   | LRT  | P-value | SNP Set Proportion | Proportion of <i>Chip</i> Heritability | Factor |
|------------|-----------|------|------|---------|--------------------|----------------------------------------|--------|
| A          | 0.62      | 0.31 | 3.87 | 0.02    | 0.06               | 0.69                                   | 11.4   |
| CT         | 0.00      | 0.42 | 0.00 | 0.50    | 0.15               | 0.00                                   | 0.0    |
| Complement | 0.28      | 0.45 | 0.45 | 0.25    | 0.79               | 0.31                                   | 0.4    |

Table S30. Index subset analysis of the merged Hispanic dataset with BMI  $\geq 30$ . BMI was not included as a covariate in this analysis. REML estimates of phenotypic variance explained by the additive effect of SNPs from each subset are given with standard error (SE), LRT statistic,  $p$ -value, SNP set proportion, and proportion of *chip* heritability explained. Factor relates SNP set proportion to proportion of *chip* heritability explained. A and CT denote adipose-specific and cross-tissue eQTL subsets, respectively.

| Subset                   | $V_a/V_p$ | SE   | LRT  | P-value | SNP Set Proportion | Proportion of <i>Chip</i> Heritability | Factor |
|--------------------------|-----------|------|------|---------|--------------------|----------------------------------------|--------|
| <b>“Lean” cohort</b>     |           |      |      |         |                    |                                        |        |
| A $\cup$ AM              | 0.15      | 0.30 | 0.25 | 0.31    | 0.12               | 0.22                                   | 1.8    |
| Complement               | 0.54      | 0.31 | 2.8  | 0.05    | 0.88               | 0.78                                   | 0.9    |
| <b>“Non-lean” cohort</b> |           |      |      |         |                    |                                        |        |
| A $\cup$ AM              | 0.69      | 0.38 | 3.23 | 0.04    | 0.12               | 0.77                                   | 6.3    |
| Complement               | 0.20      | 0.38 | 0.29 | 0.30    | 0.88               | 0.23                                   | 0.3    |

Table S31. Index subset analysis of the merged Hispanic. SNPs were partitioned into the set comprised of the union of adipose-specific eQTLs and eQTLs mapped in both adipose and muscle tissue ( $A \cup AM$ ) and the complement set of SNPs. For the “lean” (BMI  $< 30$ ) and “non-lean” (BMI  $\geq 30$ ) cohort, REML estimates of phenotypic variance explained by the additive effect of SNPs from each subset are given with standard error (SE), LRT statistic,  $p$ -value, SNP set proportion, and proportion of *chip* heritability explained. Factor relates SNP set proportion to proportion of *chip* heritability explained.

| Subset      | $V_a/V_p$ | SE   | LRT   | P-value                 | SNP Set Proportion | Proportion of <i>Chip</i> Heritability | Factor |
|-------------|-----------|------|-------|-------------------------|--------------------|----------------------------------------|--------|
| <b>GCTA</b> |           |      |       |                         |                    |                                        |        |
| L           | 0.02      | 0.0  | 0.12  | 0.36                    | 0.26               | 0.03                                   | 0.1    |
| IRPT        | 0.15      | 0.06 | 6.16  | $6.5 \times 10^{-03}$   | 0.16               | 0.24                                   | 1.5    |
| AML         | 0.18      | 0.05 | 13.36 | $1.2 \times 10^{-04}$   | 0.09               | 0.28                                   | 3.1    |
| Comp.       | 0.29      | 0.07 | 16.46 | $2.5 \times 10^{-05}$   | 0.49               | 0.45                                   | 0.9    |
| <b>LDAK</b> |           |      |       |                         |                    |                                        |        |
| L           | 0.12      | 0.05 | 6.34  | $5.9 \times 10^{-03}$   | 0.26               | 0.15                                   | 0.6    |
| IRPT        | 0.17      | 0.05 | 11.00 | $4.5 \times 10^{-04}$   | 0.16               | 0.20                                   | 1.3    |
| AML         | 0.13      | 0.04 | 12.26 | $2.3 \times 10^{-04}$   | 0.09               | 0.16                                   | 1.8    |
| Comp.       | 0.43      | 0.07 | 38.25 | $3.11 \times 10z^{-10}$ | 0.49               | 0.50                                   | 1.0    |

Table S32. GRM-adjusted estimates of narrow-sense heritability explained by eQTL subsets in the WTCCC dataset. Heritability estimates corresponding to the unadjusted GRM (GCTA) and LD-adjusted GRM (LDAK) for each subset are given with standard error (SE), LRT statistic,  $p$ -value, SNP set proportion, and proportion of *chip* heritability explained. Factor relates SNP set proportion to proportion of *chip* heritability explained.

| Subset      | $V_a/V_p$ | SE   | LRT  | P-value               | SNP Set Proportion | Proportion of <i>Chip</i> Heritability | Factor |
|-------------|-----------|------|------|-----------------------|--------------------|----------------------------------------|--------|
| <b>GCTA</b> |           |      |      |                       |                    |                                        |        |
| L           | 0.00      | 0.16 | 0.01 | 0.47                  | 0.26               | 0.00                                   | 0.0    |
| IRPT        | 0.53      | 0.21 | 7.2  | $3.6 \times 10^{-03}$ | 0.16               | 0.92                                   | 5.8    |
| AML         | 0.05      | 0.16 | 0.76 | 0.19                  | 0.09               | 0.08                                   | 0.9    |
| Comp.       | 0.00      | 0.21 | 0.00 | 0.5                   | 0.49               | 0.00                                   | 0.0    |
| <b>LDAK</b> |           |      |      |                       |                    |                                        |        |
| L           | 0.07      | 0.11 | 0.38 | 0.27                  | 0.26               | 0.10                                   | 0.4    |
| IRPT        | 0.21      | 0.12 | 3.20 | 0.037                 | 0.16               | 0.31                                   | 1.9    |
| AML         | 0.13      | 0.09 | 2.28 | 0.07                  | 0.09               | 0.19                                   | 2.1    |
| Comp.       | 0.27      | 0.15 | 3.20 | 0.04                  | 0.50               | 0.40                                   | 0.8    |

Table S33. GRM-adjusted estimates of narrow-sense heritability explained by eQTL subsets in the merged Hispanic dataset. Heritability estimates corresponding to the unadjusted GRM (GCTA) and LD-adjusted GRM (LDAK) for each subset are given with standard error (SE), LRT statistic,  $p$ -value, SNP set proportion, and proportion of *chip* heritability explained. Factor relates SNP set proportion to proportion of *chip* heritability explained.



| <b>Threshold (%)</b> | <b>Subjects (n)</b> | <b><math>V_a/V_p</math></b> | <b>SE</b> |
|----------------------|---------------------|-----------------------------|-----------|
| 2.5                  | 667                 | 0.80                        | 0.40      |
| 5                    | 1540                | 0.60                        | 0.20      |
| 10                   | 2272                | 0.60                        | 0.14      |
| 15                   | 2628                | 0.62                        | 0.12      |
| 20                   | 2730                | 0.60                        | 0.11      |
| None                 | 2928                | 0.48                        | 0.10      |

Table S34. Evaluation of genetic relatedness thresholds applied to the merged Hispanic dataset. REML estimates of phenotypic variance explained by GWAS SNPs are given with standard error (SE) and number of subjects retained (n) for each relatedness threshold.

| Subset               | $V_a/V_p$ | SE   | LRT   | P-value               | SNP Set Proportion | Proportion of <i>Chip</i> Heritability | Factor |
|----------------------|-----------|------|-------|-----------------------|--------------------|----------------------------------------|--------|
| <b>MAF 1%</b>        |           |      |       |                       |                    |                                        |        |
| L                    | 0.02      | 0.05 | 0.12  | 0.36                  | 0.26               | 0.03                                   | 0.1    |
| A $\cup$ M $\cup$ AM | 0.15      | 0.06 | 6.16  | $6.5 \times 10^{-03}$ | 0.16               | 0.24                                   | 1.6    |
| AML                  | 0.18      | 0.05 | 13.36 | $1.3 \times 10^{-03}$ | 0.09               | 0.28                                   | 3.1    |
| Complement           | 0.29      | 0.07 | 16.46 | $2.5 \times 10^{-05}$ | 0.49               | 0.45                                   | 0.9    |
| <b>MAF 5%</b>        |           |      |       |                       |                    |                                        |        |
| L                    | 0.02      | 0.05 | 0.17  | 0.34                  | 0.27               | 0.04                                   | 0.1    |
| A $\cup$ M $\cup$ AM | 0.16      | 0.06 | 8.0   | $2.3 \times 10^{-03}$ | 0.14               | 0.27                                   | 2.0    |
| AML                  | 0.18      | 0.05 | 13.32 | $1.3 \times 10^{-03}$ | 0.09               | 0.30                                   | 3.2    |
| Complement           | 0.24      | 0.06 | 13.35 | $1.3 \times 10^{-03}$ | 0.50               | 0.39                                   | 0.8    |

Table S35. Effect of MAF threshold on partition analysis of the WTCCC dataset. REML estimates of phenotypic variance explained by the additive effect of SNPs from each subset in an IRPT-LCL partition analysis are given with standard error (SE), LRT statistic,  $p$ -value, SNP set proportion, and proportion of *chip* heritability explained. Factor relates SNP set proportion to proportion of *chip* heritability explained.

| Subset               | $V_a/V_p$ | SE   | LRT   | P-value               | SNP Set Proportion | Proportion of <i>Chip</i> Heritability | Factor |
|----------------------|-----------|------|-------|-----------------------|--------------------|----------------------------------------|--------|
| <b>MAF 1%</b>        |           |      |       |                       |                    |                                        |        |
| L                    | 0.02      | 0.05 | 0.12  | 0.36                  | 0.26               | 0.03                                   | 0.1    |
| A $\cup$ M $\cup$ AM | 0.15      | 0.06 | 6.16  | $6.5 \times 10^{-03}$ | 0.16               | 0.24                                   | 1.6    |
| AML                  | 0.18      | 0.05 | 13.36 | $1.3 \times 10^{-03}$ | 0.09               | 0.28                                   | 3.1    |
| Complement           | 0.29      | 0.07 | 16.46 | $2.5 \times 10^{-05}$ | 0.49               | 0.45                                   | 0.9    |
| <b>MAF 5%</b>        |           |      |       |                       |                    |                                        |        |
| L                    | 0.02      | 0.05 | 0.17  | 0.34                  | 0.27               | 0.04                                   | 0.1    |
| A $\cup$ M $\cup$ AM | 0.16      | 0.06 | 8.0   | $2.3 \times 10^{-03}$ | 0.14               | 0.27                                   | 2.0    |
| AML                  | 0.18      | 0.05 | 13.32 | $1.3 \times 10^{-03}$ | 0.09               | 0.30                                   | 3.2    |
| Complement           | 0.24      | 0.06 | 13.35 | $1.3 \times 10^{-03}$ | 0.50               | 0.39                                   | 0.8    |

Table S36. Effect of MAF threshold on partition analysis of the merged Hispanic dataset. REML estimates of phenotypic variance explained by the additive effect of SNPs from each subset in an IRPT-LCL partition analysis are given with standard error (SE), LRT statistic,  $p$ -value, SNP set proportion, and proportion of *chip* heritability explained. Factor relates SNP set proportion to proportion of *chip* heritability explained.
